# Supplementary material for: Antibacterial and Antifungal Sesquiterpenoids from Aerial Parts of Anvillea garcinii
Source: Molecules. 2020 Apr 9;25(7):1730. doi: 10.3390/molecules25071730 (PMC7180898; doi:10.3390/molecules25071730)
Supplement: Supplementary file 1 [file molecules-25-01730-s001.pdf]

# Antibacterial and antifungal sesquiterpenoids from aerial parts of *Anvillea garcinii*

Shagufta Perveen<sup>1,\*</sup>, Jawaher Alqahtani<sup>1,2</sup>, Raha Orfali<sup>1</sup>, Hanan Y. Aati<sup>1</sup>, Areej M. Al-Taweel<sup>1</sup>, Taghreed A. Ibrahim<sup>1</sup>, Afsar Khan<sup>3</sup>, Hasan S. Yusufoglu<sup>4</sup>, Maged S. Abdel-Kader<sup>4,5</sup> and Orazio Taglialatela-Scafati<sup>2,\*</sup>

## Supplementary data

- Figure S1.** <sup>1</sup>H NMR Spectrum of Compound **1** in CD<sub>3</sub>OD.
- Figure S2.** <sup>13</sup>C NMR Spectrum of Compound **1** in CD<sub>3</sub>OD.
- Figure S3.** DEPT-90 NMR Spectrum of Compound **1** in CD<sub>3</sub>OD.
- Figure S4.** DEPT-135 NMR Spectrum of Compound **1** in CD<sub>3</sub>OD.
- Figure S5.** 2D COSY NMR Spectrum of Compound **1** in CD<sub>3</sub>OD.
- Figure S6.** HSQC Spectrum of Compound **1** in CD<sub>3</sub>OD.
- Figure S7.** Negative ESI Mass Spectrum of Compound **1**.
- Figure S8.** <sup>1</sup>H NMR Spectrum of Compound **2** in CD<sub>3</sub>OD.
- Figure S9.** <sup>13</sup>C NMR Spectrum of Compound **2** in CD<sub>3</sub>OD.
- Figure S10.** DEPT-135 NMR Spectrum of Compound **2** in CD<sub>3</sub>OD.
- Figure S11.** DEPT-90 NMR Spectrum of Compound **2** in CD<sub>3</sub>OD.
- Figure S12.** 2D COSY NMR spectrum of Compound **2** in CD<sub>3</sub>OD.
- Figure S13.** HSQC Spectrum of Compound **2** in CD<sub>3</sub>OD.
- Figure S14.** Positive ESI Mass Spectra of Compound **2**.
- Figure S15.** <sup>1</sup>H NMR spectrum of compound **3**.
- Figure S16.** <sup>13</sup>C NMR spectrum of compound **3**.
- Figure S17.** <sup>1</sup>H NMR spectrum of compound **4**.
- Figure S18.** <sup>13</sup>C NMR spectrum of compound **4**.
- Figure S19.** DEPT NMR spectrum of compound **4**.
- Figure S20.** <sup>1</sup>H NMR spectrum of compound **5**.
- Figure S21.** <sup>13</sup>C NMR spectrum of compound **5**.
- Figure S22.** <sup>1</sup>H NMR spectrum of compound **6**.
- Figure S23.** 2D HSQC NMR spectrum of compound **6**.

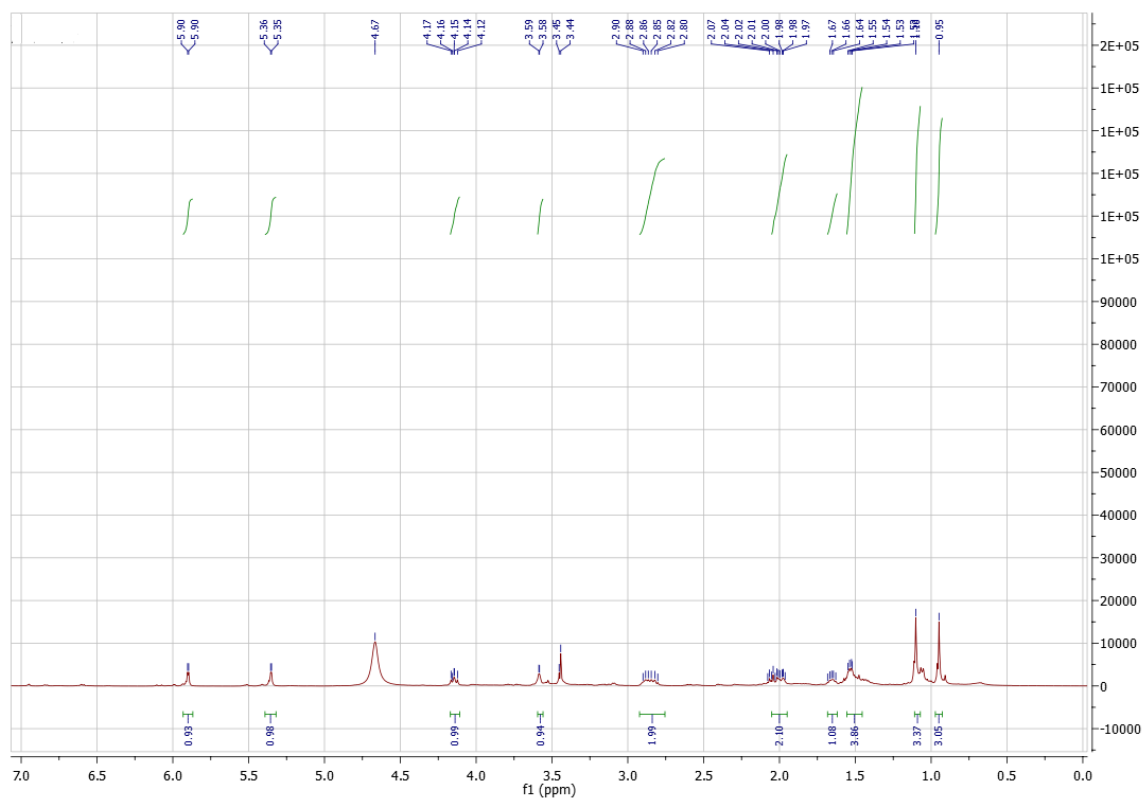

**Figure S1.**  $^1\text{H}$  NMR spectrum of Compound 1 in  $\text{CD}_3\text{OD}$ .

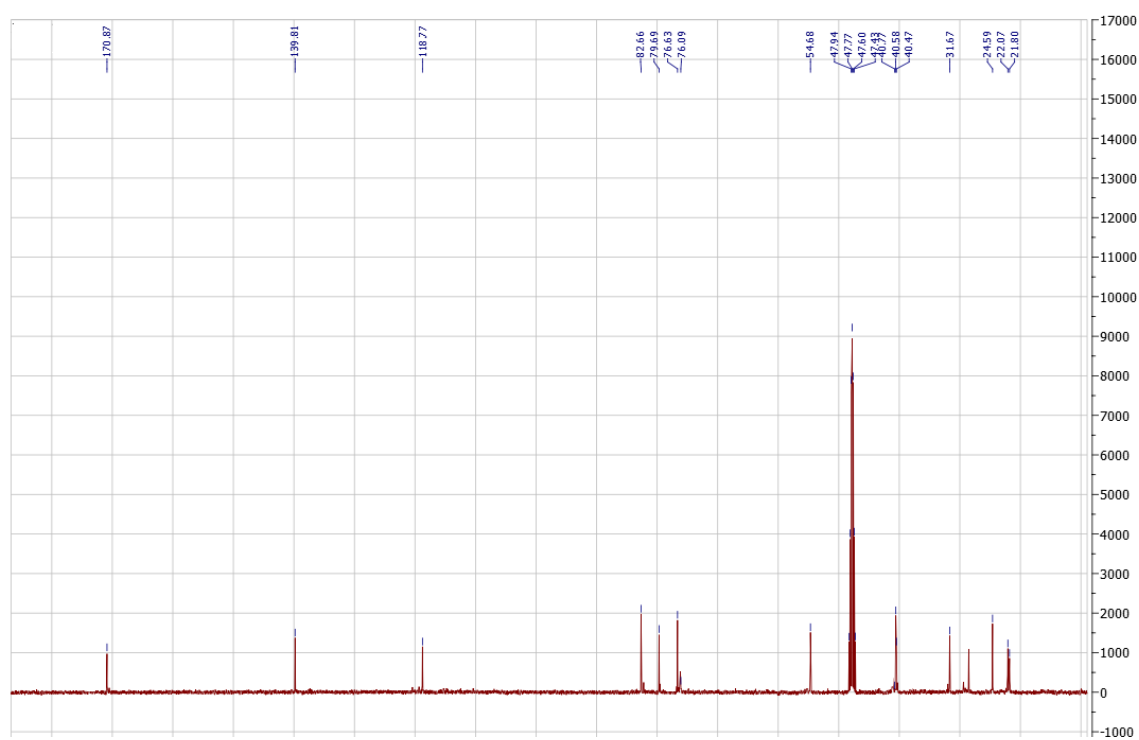

**Figure S2.**  $^{13}\text{C}$  NMR spectrum of Compound 1 in  $\text{CD}_3\text{OD}$ .

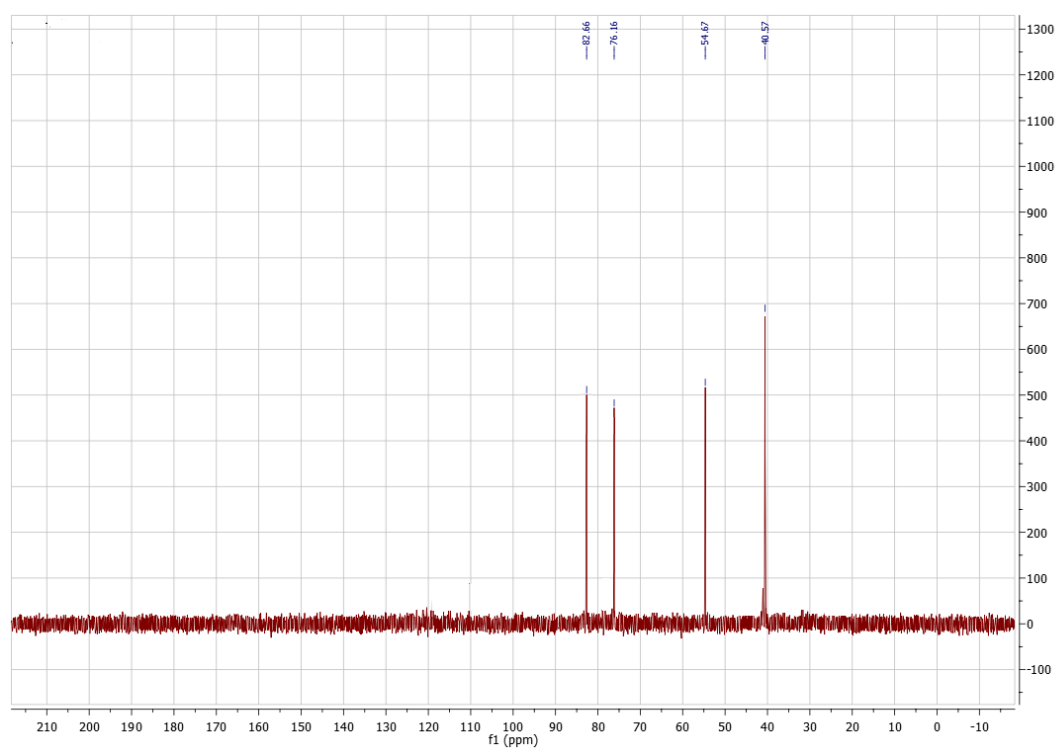

Figure S3. DEPT-90 NMR spectrum of Compound 1 in CD<sub>3</sub>OD.

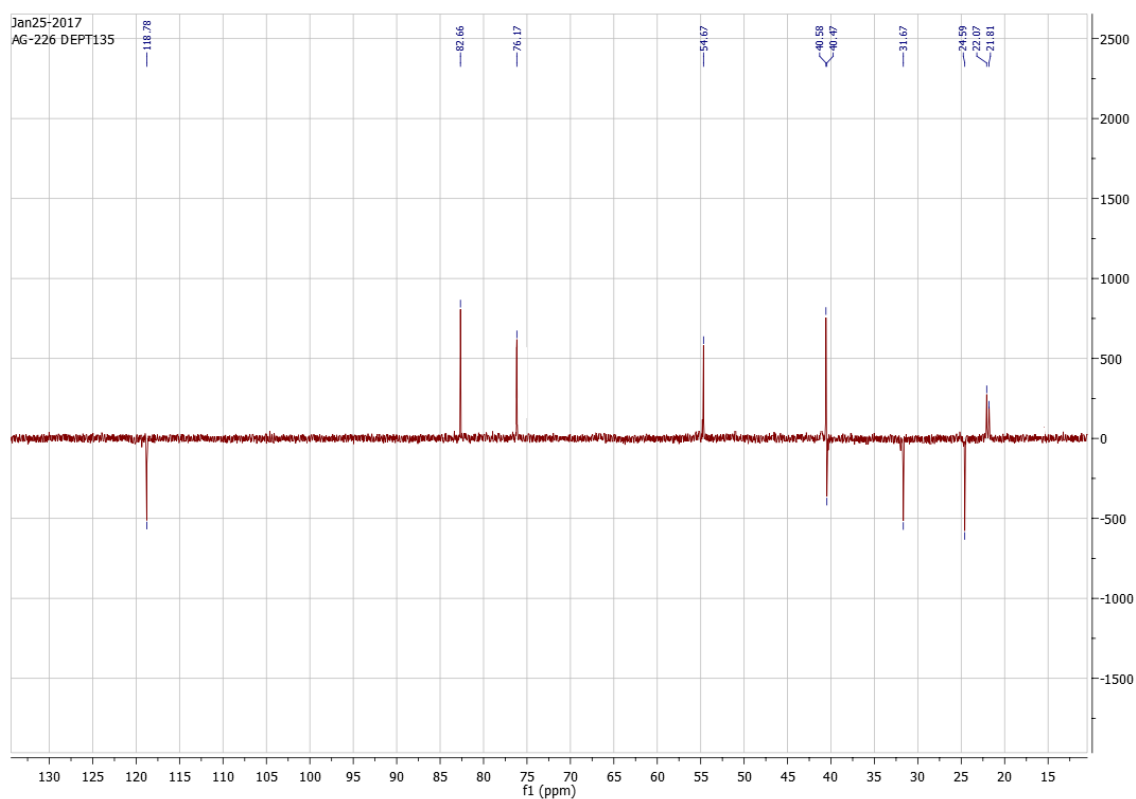

Figure S4. DEPT-135 NMR Spectra of Compound 1 in CD<sub>3</sub>OD.

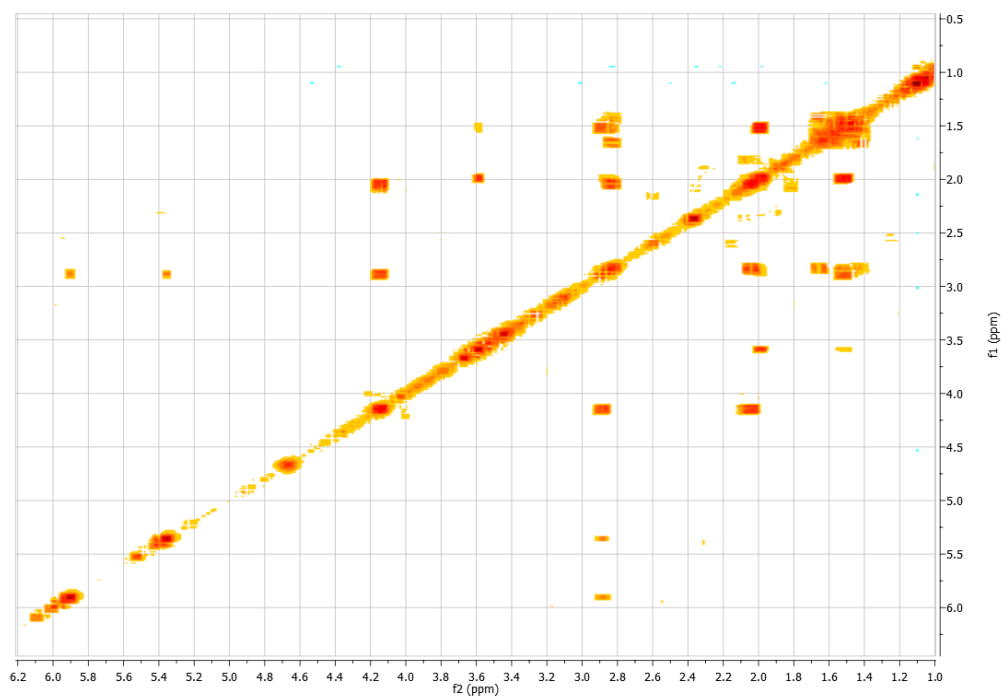

**Figure S5.** 2D COSY NMR Spectrum of Compound **1** in CD<sub>3</sub>OD.

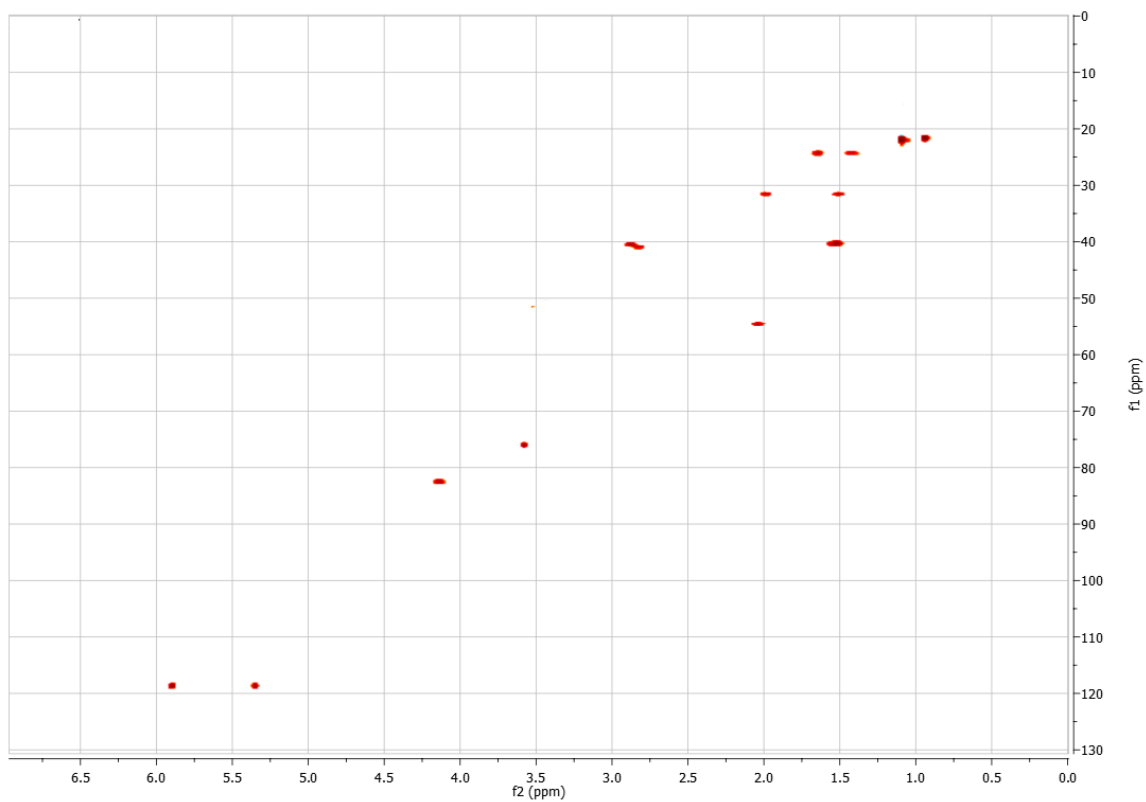

**Figure S6.** 2D NMR HSQC spectrum of Compound **1** in CD<sub>3</sub>OD.

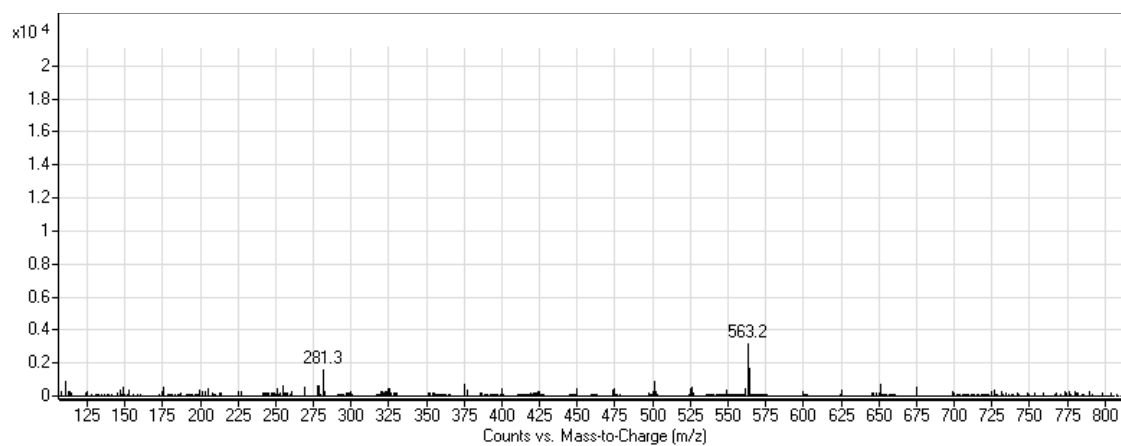

**Figure S7.** Negative-ions ESI Mass spectrum of Compound 1.

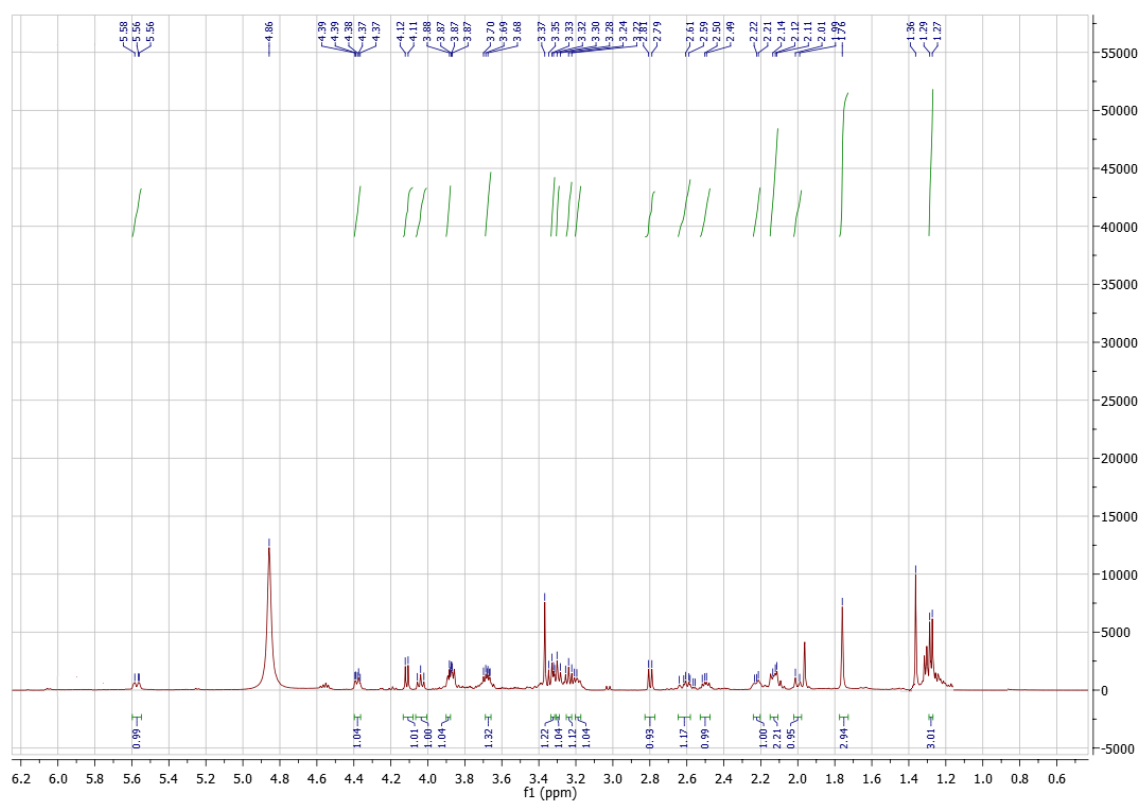

**Figure S8.** <sup>1</sup>H NMR spectrum of Compound 2 in CD<sub>3</sub>OD.

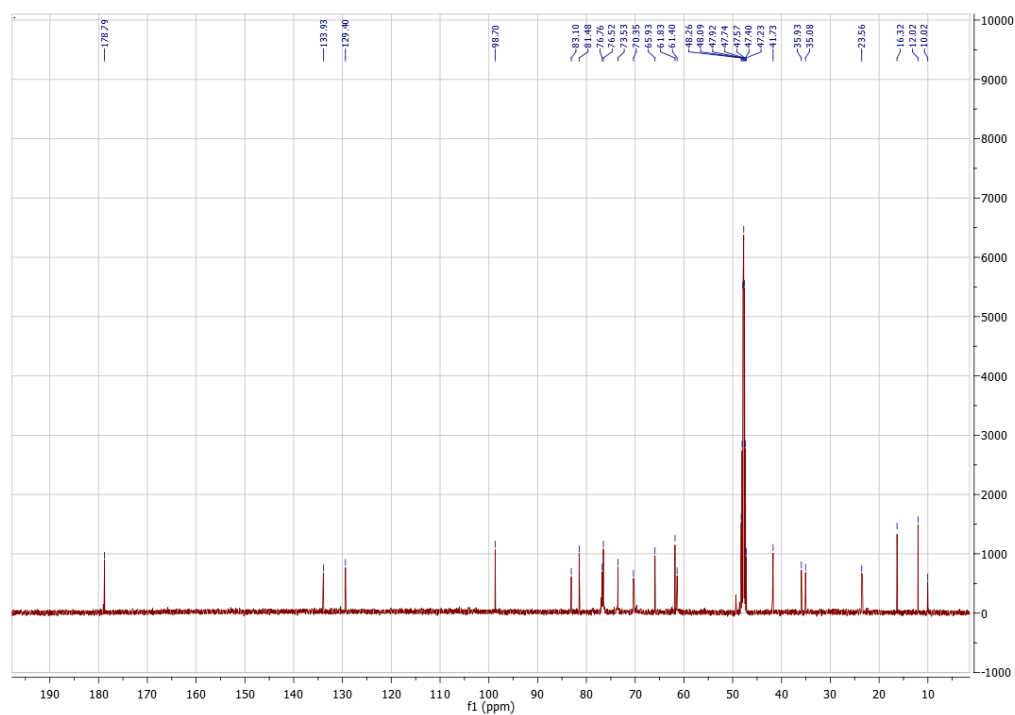

Figure S9. <sup>13</sup>C NMR spectrum of Compound 2 in CD<sub>3</sub>OD.

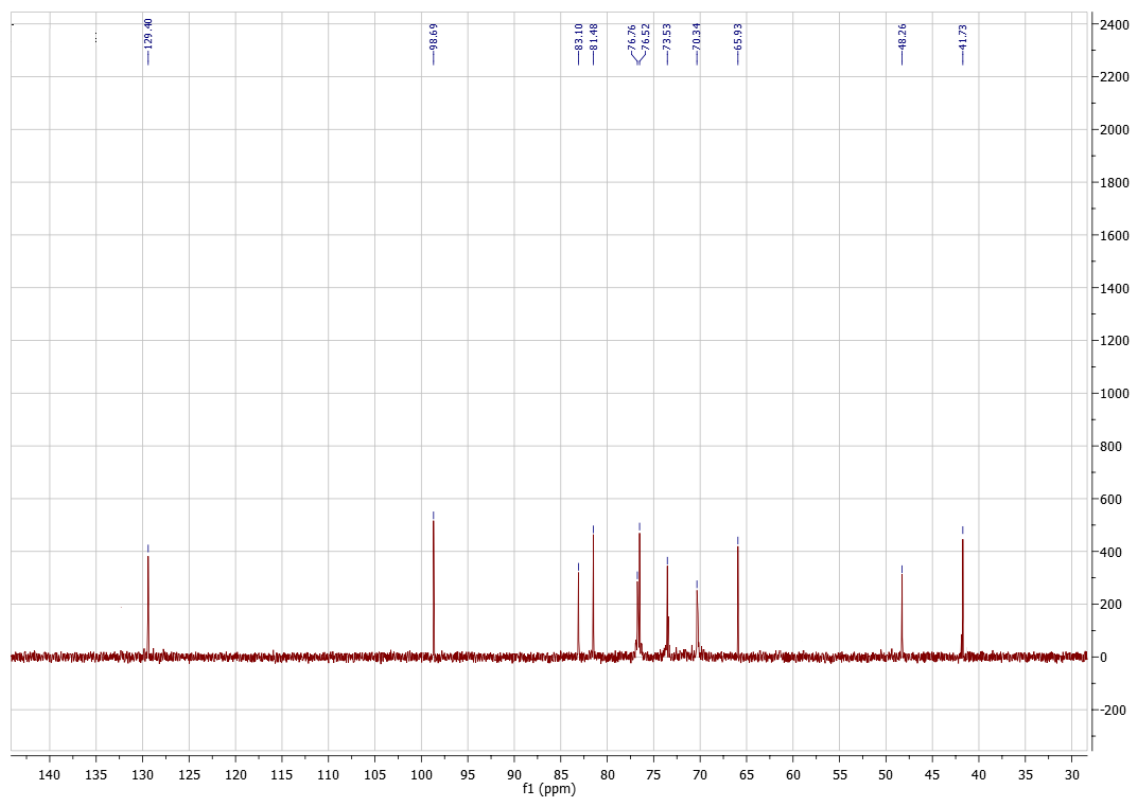

Figure S10. DEPT-90 NMR spectrum of Compound 2 in CD<sub>3</sub>OD.

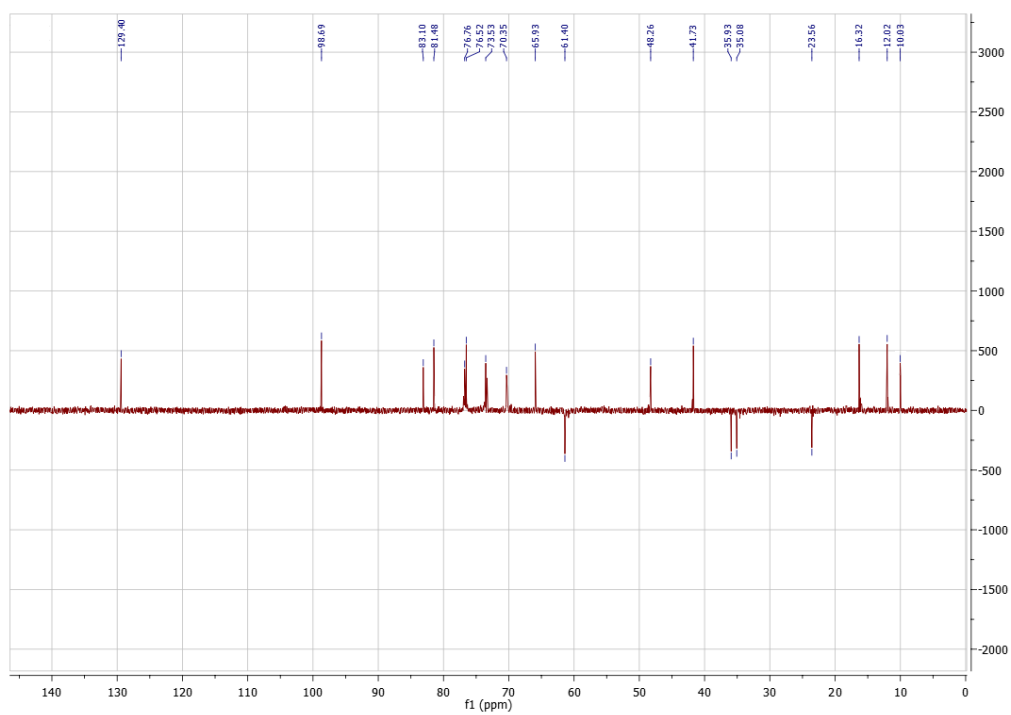

Figure S11. DEPT-135 NMR spectrum of Compound 2 in CD<sub>3</sub>OD.

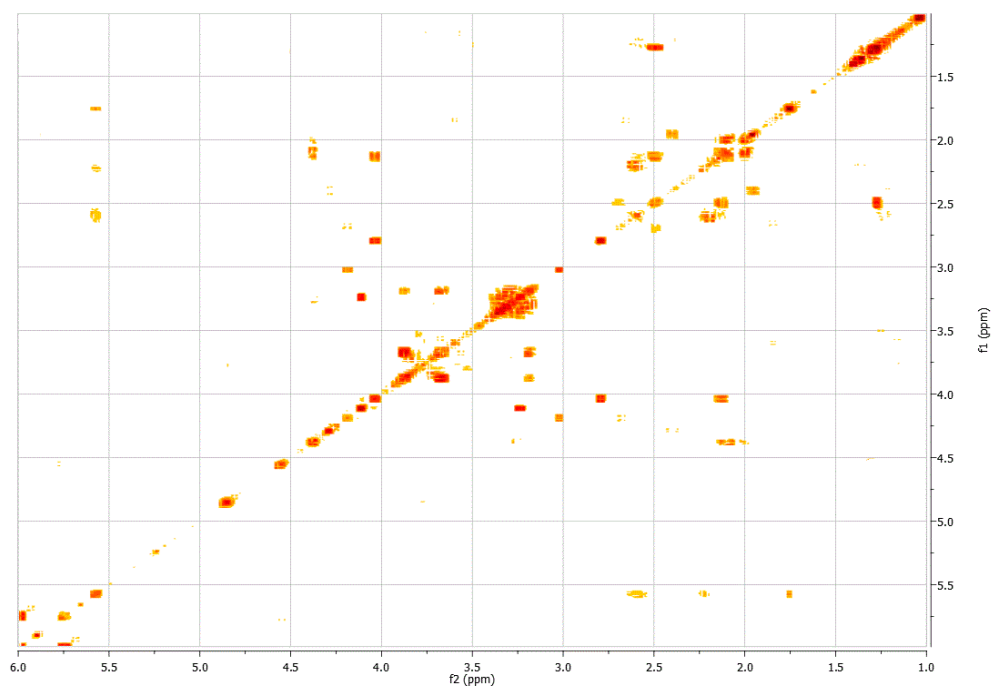

Figure S12. 2D COSY NMR spectrum of Compound 2 in CD<sub>3</sub>OD.

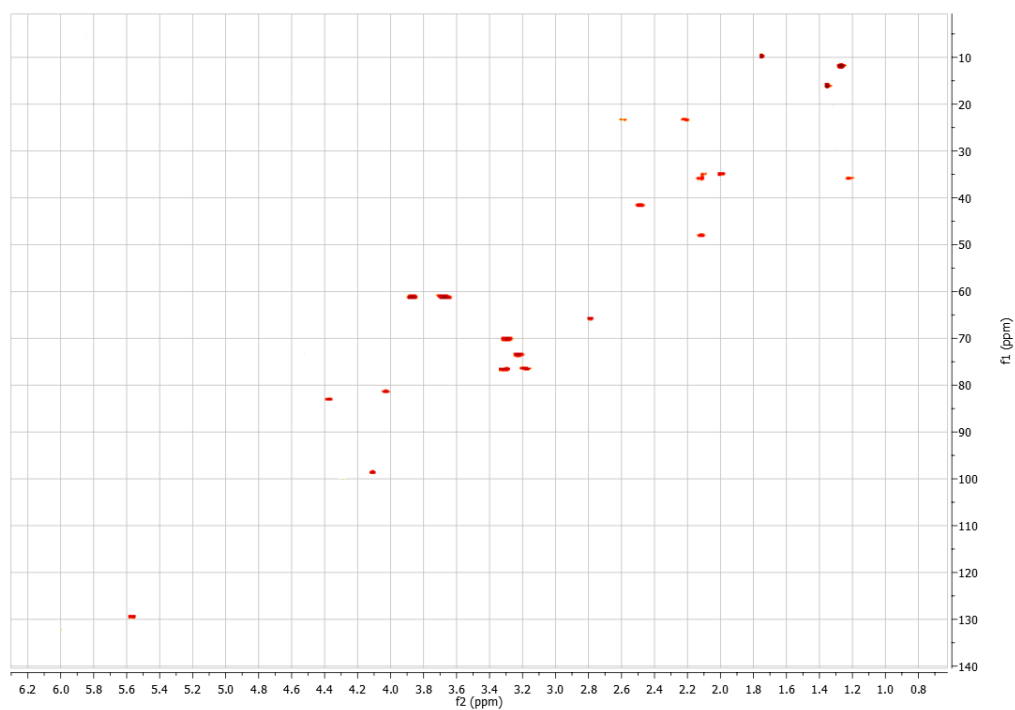

**Figure S13.** HSQC spectrum of Compound 2 in CD<sub>3</sub>OD.

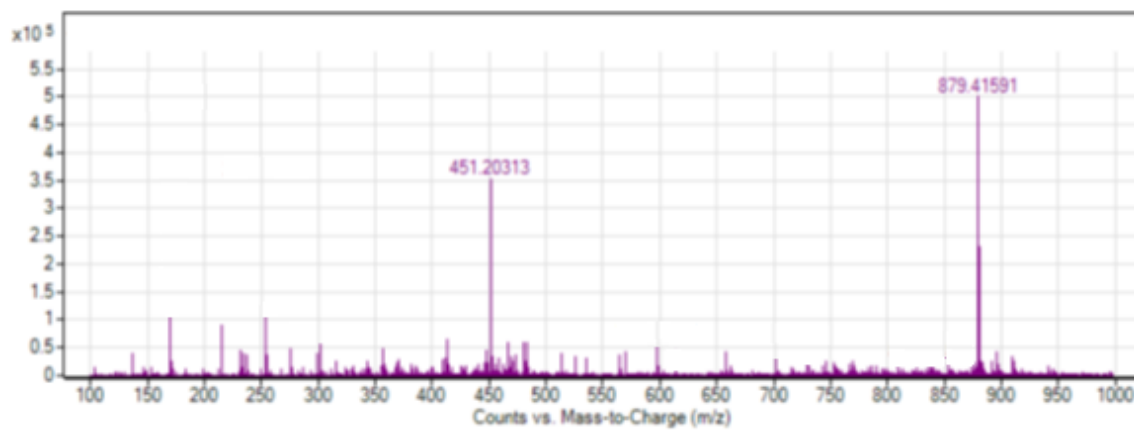

**Figure S14.** Positive ions ESI Mass spectrum of Compound 2.

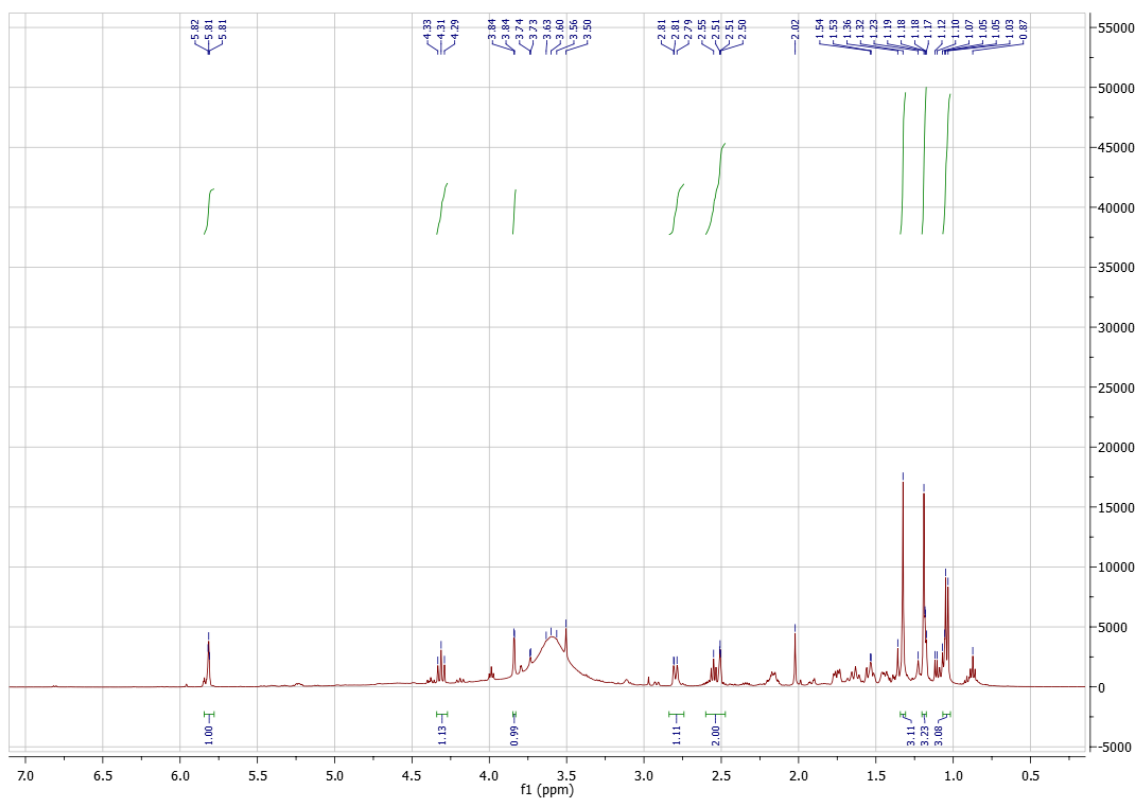

Figure S15. <sup>1</sup>H NMR spectrum of compound 3.

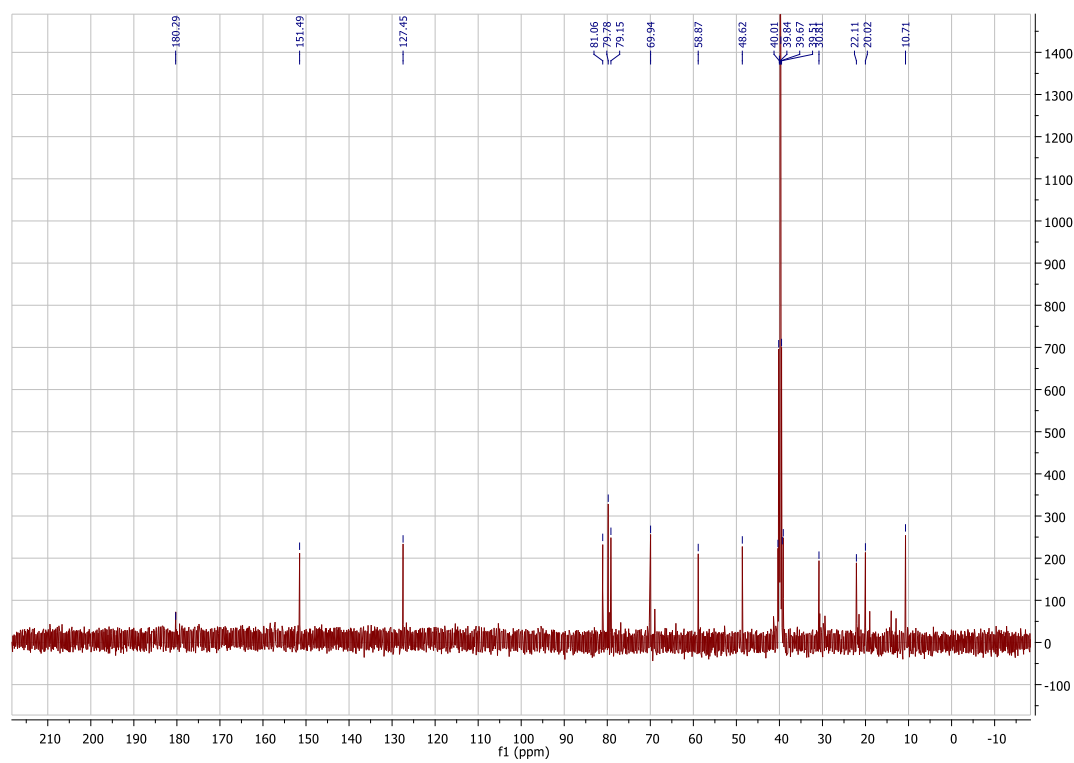

Figure S16. <sup>13</sup>C NMR spectrum of compound 3.

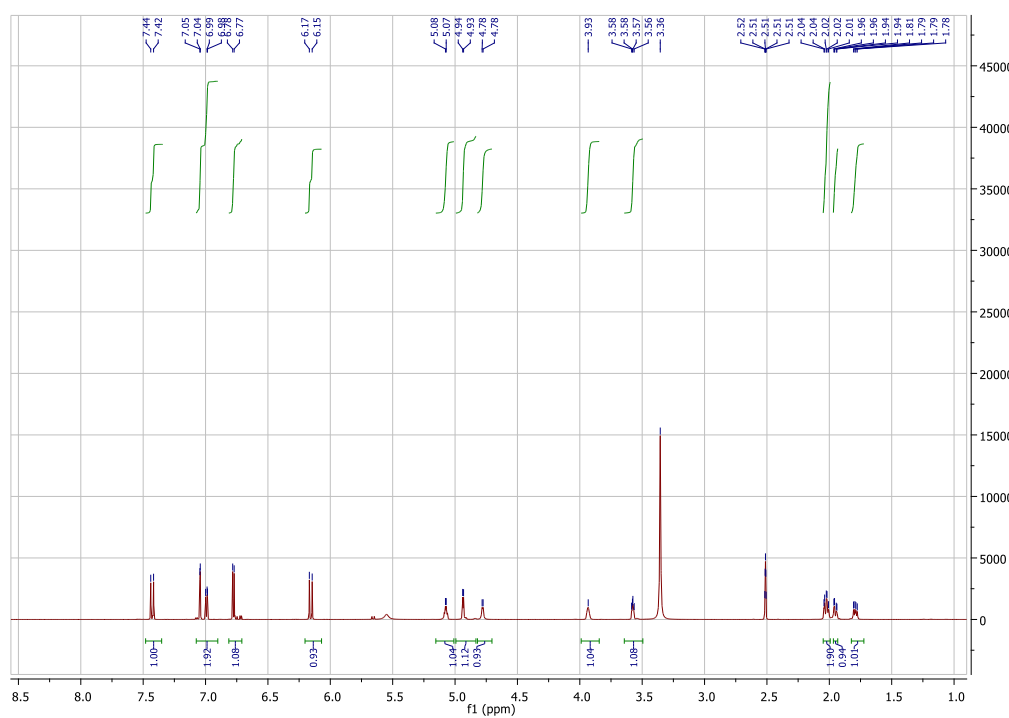

Figure S17. <sup>1</sup>H NMR spectrum of compound 4.

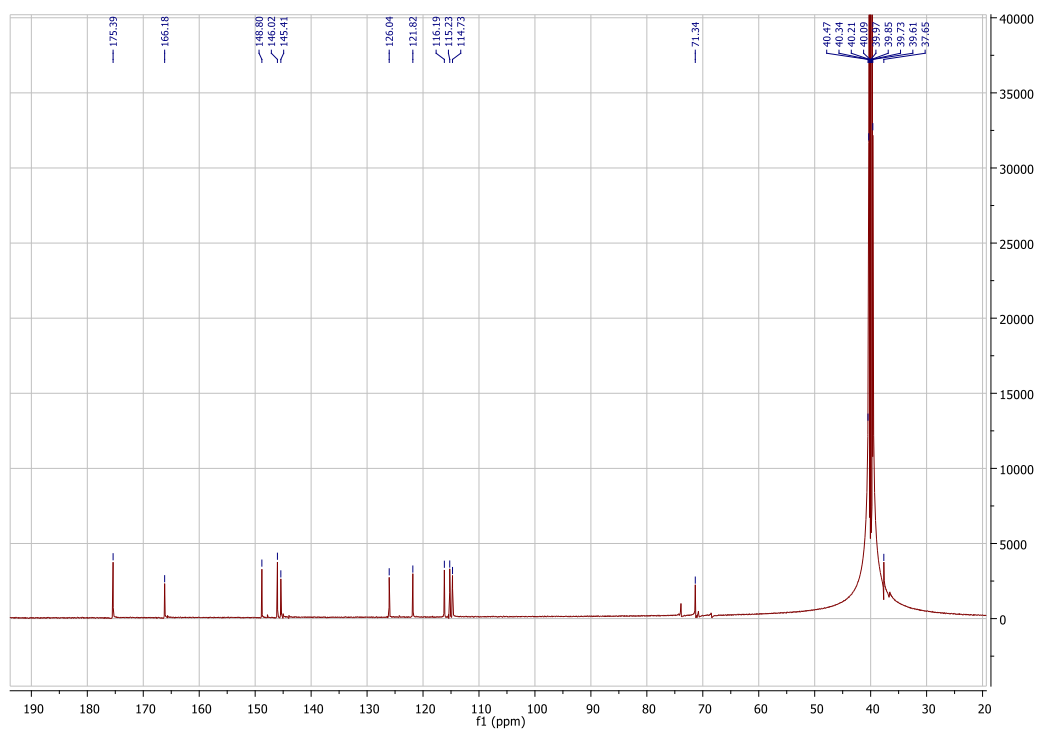

Figure S18. <sup>13</sup>C NMR spectrum of compound 4.

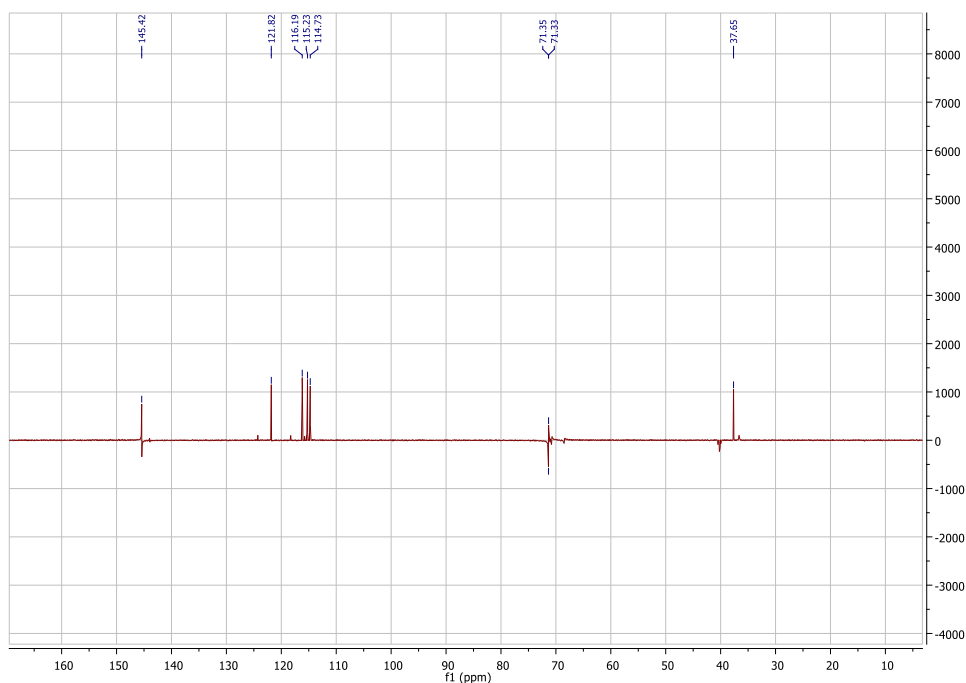

Figure S19. DEPT NMR spectrum of compound 4.

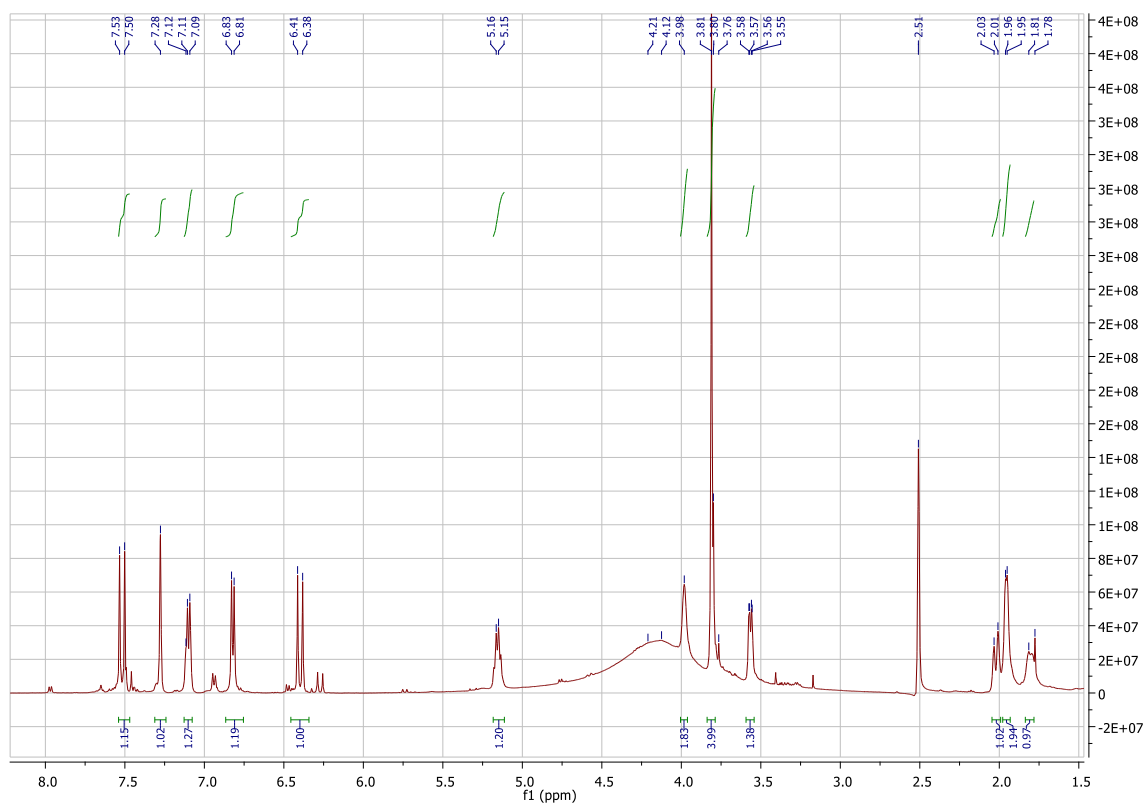

Figure S20. <sup>1</sup>H NMR spectrum of compound 5.

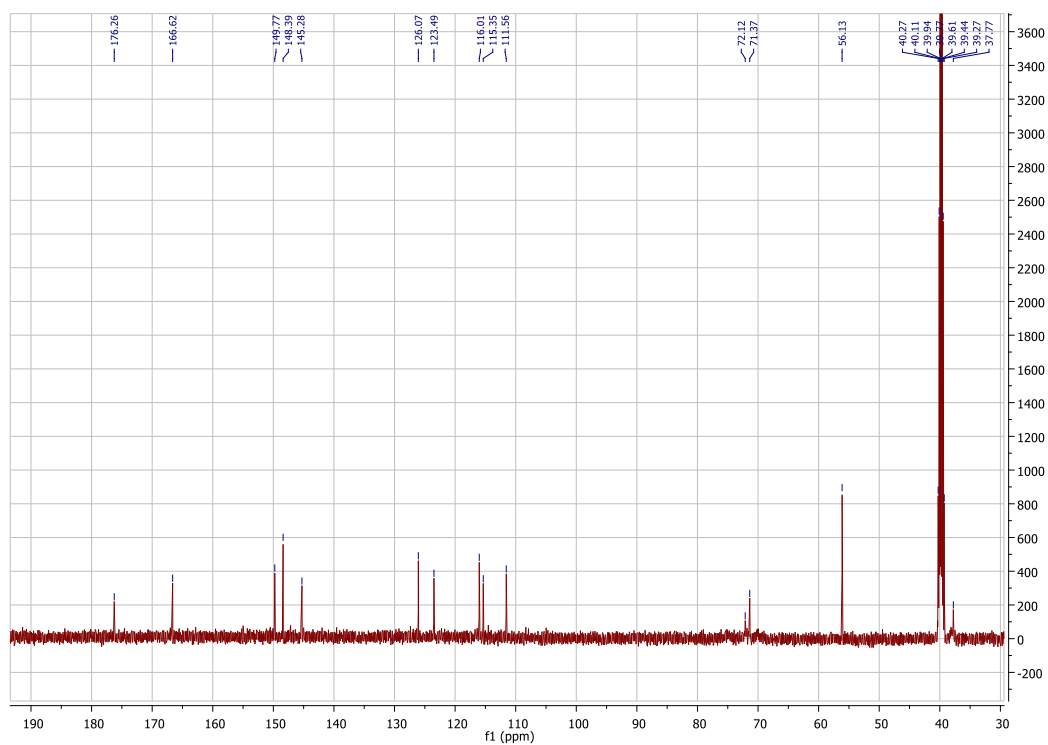

Figure S21. <sup>13</sup>C NMR spectrum of compound 5.

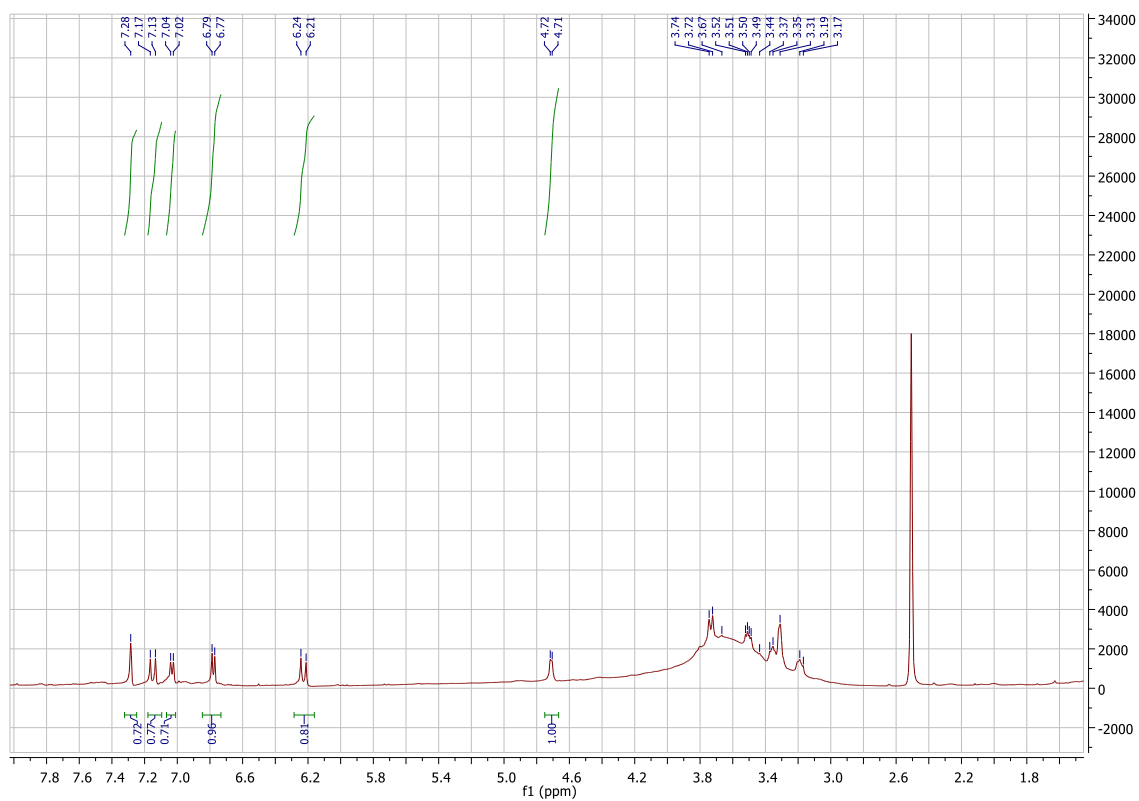

Figure S22. <sup>1</sup>H NMR spectrum of compound 6.

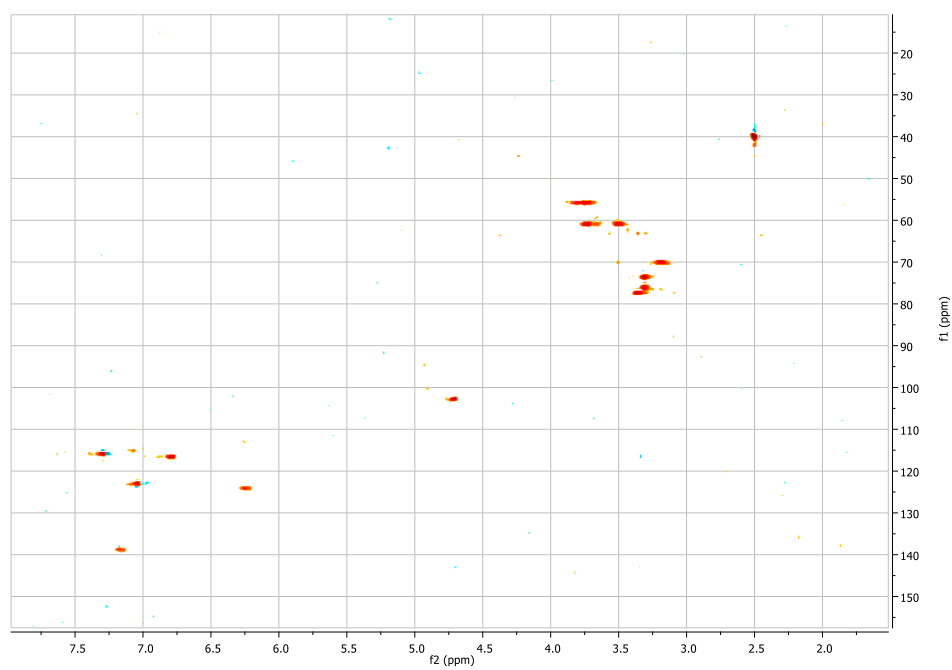

**Figure S23.** 2D HSQC NMR spectrum of compound **6**.
